# Supplementary material
Source: PubMed Central journal article supplement (PMC4715514)
Supplement: NIHMS735776-supplement-pp_info_3.pdf [file NIHMS735776-supplement-pp_info_3.pdf]

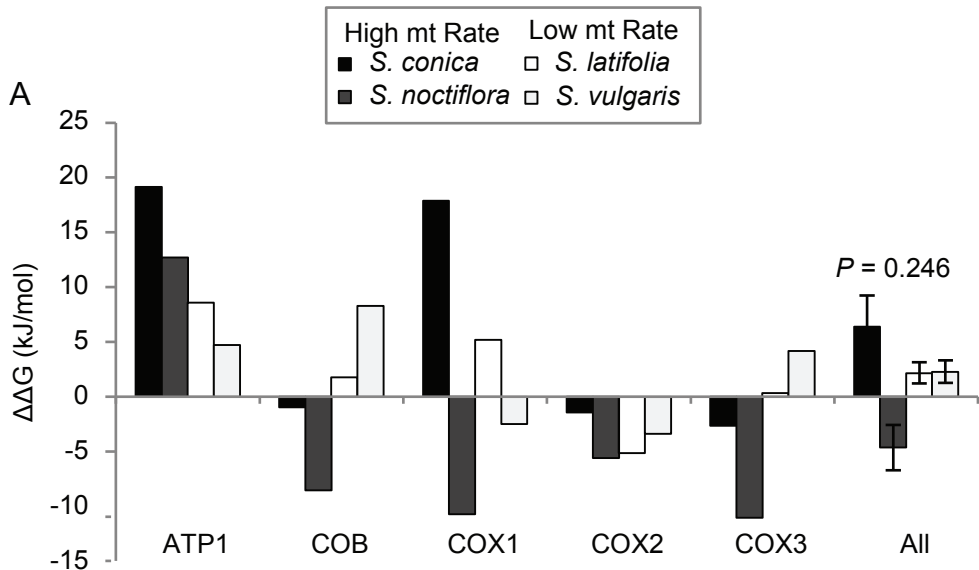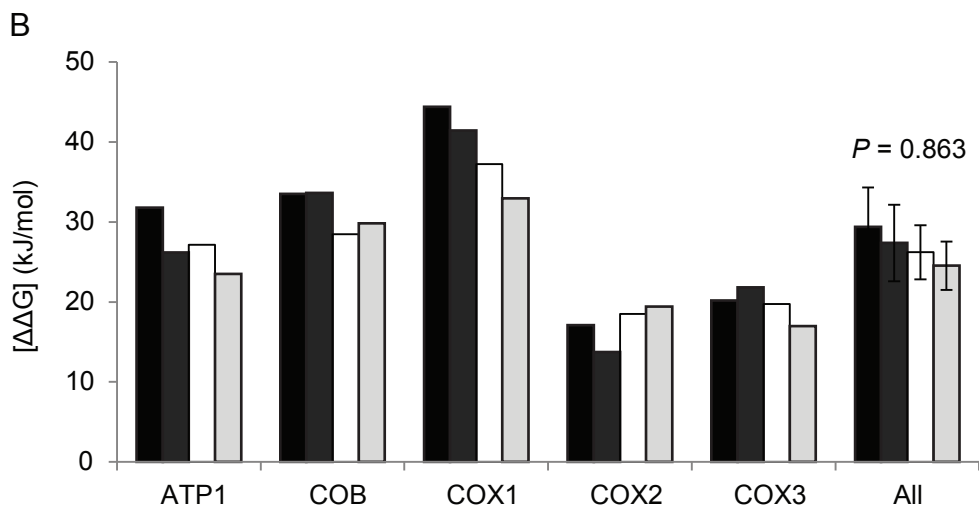

Supplement 3. Changes in thermodynamic stability ( $\Delta\Delta G$ ) between mitochondrial proteins modeled on ancestral and extant *Silene* sequences, based on (A) relative or (B) absolute  $\Delta\Delta G$ .
