# Supplementary material
Source: PubMed Central journal article supplement (PMC4715514)
Supplement: NIHMS735776-supplement-pp_info_4.pdf [file NIHMS735776-supplement-pp_info_4.pdf]

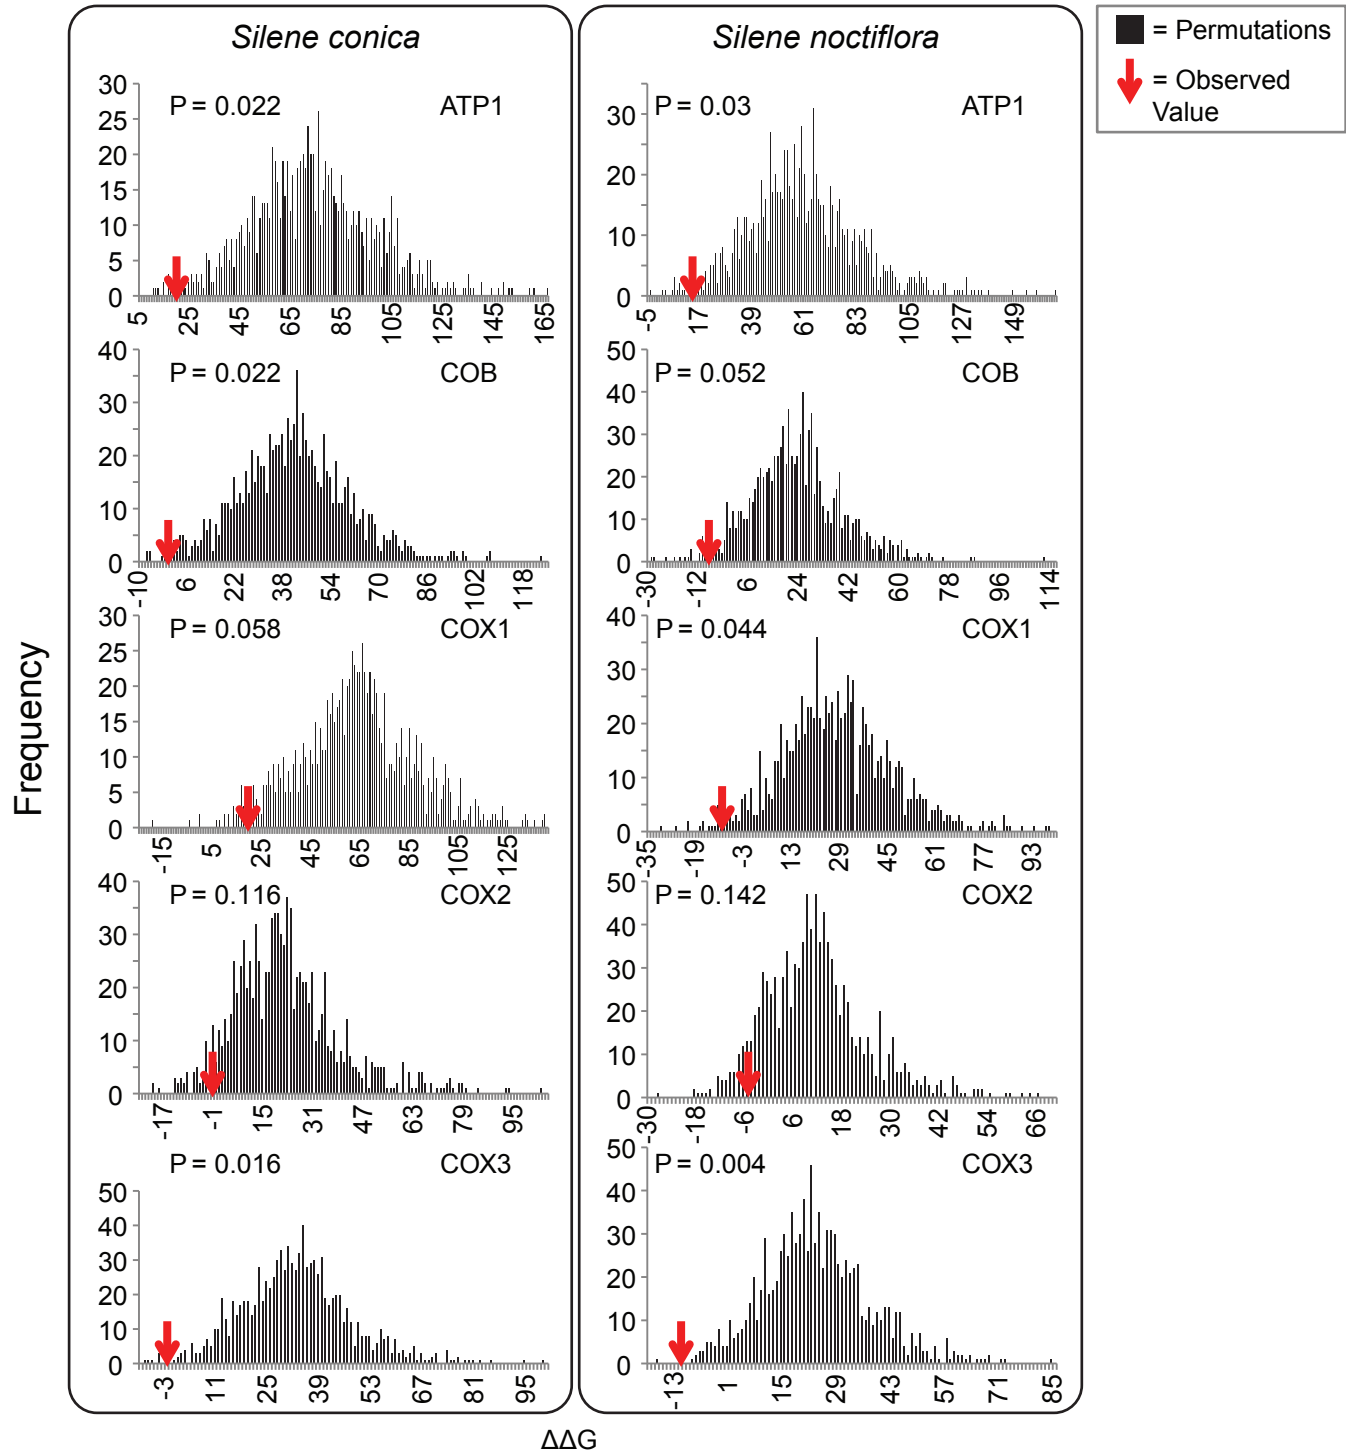

Supplement 4. Null distributions based on 1000 randomly mutated sequences for changes in thermodynamic stability ( $\Delta\Delta G$ ) between mitochondrial proteins modeled on ancestral and modern *Silene* sequences, along with the actual observed values in *Silene*.
